# Supplementary material for: Proximity analysis of native proteomes reveals phenotypic modifiers in a mouse model of autism and related neurodevelopmental conditions
Source: PubMed Central journal article supplement — Nat Commun. 2024 Aug 9;15:6801. doi: 10.1038/s41467-024-51037-x (PMC11316102; doi:10.1038/s41467-024-51037-x), 2024-08-09
Supplement: 41467_2024_51037_MOESM11_ESM.pdf [file 41467_2024_51037_MOESM11_ESM.pdf]

## Reporting Summary

Nature Portfolio wishes to improve the reproducibility of the work that we publish. This form provides structure for consistency and transparency in reporting. For further information on Nature Portfolio policies, see our [Editorial Policies](#) and the [Editorial Policy Checklist](#).

### Statistics

For all statistical analyses, confirm that the following items are present in the figure legend, table legend, main text, or Methods section.

n/a Confirmed

- The exact sample size ( $n$ ) for each experimental group/condition, given as a discrete number and unit of measurement
- A statement on whether measurements were taken from distinct samples or whether the same sample was measured repeatedly
- The statistical test(s) used AND whether they are one- or two-sided  
*Only common tests should be described solely by name; describe more complex techniques in the Methods section.*
- A description of all covariates tested
- A description of any assumptions or corrections, such as tests of normality and adjustment for multiple comparisons
- A full description of the statistical parameters including central tendency (e.g. means) or other basic estimates (e.g. regression coefficient) AND variation (e.g. standard deviation) or associated estimates of uncertainty (e.g. confidence intervals)
- For null hypothesis testing, the test statistic (e.g.  $F$ ,  $t$ ,  $r$ ) with confidence intervals, effect sizes, degrees of freedom and  $P$  value noted  
*Give  $P$  values as exact values whenever suitable.*
- For Bayesian analysis, information on the choice of priors and Markov chain Monte Carlo settings
- For hierarchical and complex designs, identification of the appropriate level for tests and full reporting of outcomes
- Estimates of effect sizes (e.g. Cohen's  $d$ , Pearson's  $r$ ), indicating how they were calculated

*Our web collection on [statistics for biologists](#) contains articles on many of the points above.*

### Software and code

Policy information about [availability of computer code](#)

|                 |                                                                                                                                                                                         |
|-----------------|-----------------------------------------------------------------------------------------------------------------------------------------------------------------------------------------|
| Data collection | Zeiss Zen, Axion Biosystems AxIS 2.5, LI-COR Image Studio 5.2, TopScan software, Noldus Observer, Avisoft SASLab Pro                                                                    |
| Data analysis   | SAS JMP Pro 15/16, Graphpad Prism, IBM SPSS Statistics 28, Venny 2.1, ShinyGo 0.76, 0.77, Proteome Discoverer 2.5, PolySTest Tool, Axion Biosystems NeuroMetric Tool 2.2. SynGO, MAGMA. |

For manuscripts utilizing custom algorithms or software that are central to the research but not yet described in published literature, software must be made available to editors and reviewers. We strongly encourage code deposition in a community repository (e.g. GitHub). See the Nature Portfolio [guidelines for submitting code & software](#) for further information.

### Data

Policy information about [availability of data](#)

All manuscripts must include a [data availability statement](#). This statement should provide the following information, where applicable:

- Accession codes, unique identifiers, or web links for publicly available datasets
- A description of any restrictions on data availability
- For clinical datasets or third party data, please ensure that the statement adheres to our [policy](#)

Requests for data, resources, and reagents should be directed to and will be fulfilled by the Corresponding Author, Dr. Scott Soderling (scott.soderling@duke.edu). Key plasmids from this study have also been deposited to Addgene. The proteomic and MEA data generated in this study are provided in the Supplementary Information / Source Data file. The proteomic data have also been deposited in the MassIVE database under accession code MSV000095141.

## Research involving human participants, their data, or biological material

Policy information about studies with [human participants or human data](#). See also policy information about [sex, gender \(identity/presentation\), and sexual orientation](#) and [race, ethnicity and racism](#).

|                                                                    |     |
|--------------------------------------------------------------------|-----|
| Reporting on sex and gender                                        | n/a |
| Reporting on race, ethnicity, or other socially relevant groupings | n/a |
| Population characteristics                                         | n/a |
| Recruitment                                                        | n/a |
| Ethics oversight                                                   | n/a |

Note that full information on the approval of the study protocol must also be provided in the manuscript.

## Field-specific reporting

Please select the one below that is the best fit for your research. If you are not sure, read the appropriate sections before making your selection.

Life sciences  Behavioural & social sciences  Ecological, evolutionary & environmental sciences

For a reference copy of the document with all sections, see [nature.com/documents/nr-reporting-summary-flat.pdf](https://www.nature.com/documents/nr-reporting-summary-flat.pdf)

## Life sciences study design

All studies must disclose on these points even when the disclosure is negative.

|                 |                                                                                                                                                                                                                                                                                       |
|-----------------|---------------------------------------------------------------------------------------------------------------------------------------------------------------------------------------------------------------------------------------------------------------------------------------|
| Sample size     | Sample sizes were determined based on previous experiences (Uezu et al, Science, 2016; Courtland et al, eLife, 2021; Erata et al, J Neurosci, 2021; Wang et al, Hum Mol Genet, 2011; Pappas et al, JCI Insight, 2017). No statistical methods were used to predetermine sample sizes. |
| Data exclusions | No data in study groups were excluded from the analyses.                                                                                                                                                                                                                              |
| Replication     | All attempts at replication (at least 3 replicates) were successful.                                                                                                                                                                                                                  |
| Randomization   | Allocation was random when possible. For the MEA experiments, different groups were allocated on an alternating pattern across the plate to minimize the potential bias of plating conditions.                                                                                        |
| Blinding        | Behavioral data were collected blinded to the experimental conditions. For other experiments, the investigators were not blinded to group allocation.                                                                                                                                 |

## Reporting for specific materials, systems and methods

We require information from authors about some types of materials, experimental systems and methods used in many studies. Here, indicate whether each material, system or method listed is relevant to your study. If you are not sure if a list item applies to your research, read the appropriate section before selecting a response.

### Materials & experimental systems

|                                     |                                                                 |
|-------------------------------------|-----------------------------------------------------------------|
| n/a                                 | Involvement in the study                                        |
| <input type="checkbox"/>            | <input checked="" type="checkbox"/> Antibodies                  |
| <input type="checkbox"/>            | <input checked="" type="checkbox"/> Eukaryotic cell lines       |
| <input checked="" type="checkbox"/> | <input type="checkbox"/> Palaeontology and archaeology          |
| <input type="checkbox"/>            | <input checked="" type="checkbox"/> Animals and other organisms |
| <input checked="" type="checkbox"/> | <input type="checkbox"/> Clinical data                          |
| <input checked="" type="checkbox"/> | <input type="checkbox"/> Dual use research of concern           |
| <input checked="" type="checkbox"/> | <input type="checkbox"/> Plants                                 |

### Methods

|                                     |                                                 |
|-------------------------------------|-------------------------------------------------|
| n/a                                 | Involvement in the study                        |
| <input checked="" type="checkbox"/> | <input type="checkbox"/> ChIP-seq               |
| <input checked="" type="checkbox"/> | <input type="checkbox"/> Flow cytometry         |
| <input checked="" type="checkbox"/> | <input type="checkbox"/> MRI-based neuroimaging |

## Antibodies

|                 |                                                                                                            |
|-----------------|------------------------------------------------------------------------------------------------------------|
| Antibodies used | rabbit anti-HA, Cell Signaling #3724<br>rat anti-HA, Sigma #11867423001<br>mouse anti-PSD95, Abcam #ab2723 |
|-----------------|------------------------------------------------------------------------------------------------------------|

rabbit anti-GAPDH, Abcam #ab9485  
 rabbit anti-GAPDH, Cell Signaling #2118  
 mouse anti-V5-epitope, ThermoFisher #R960-25  
 guinea pig anti-Homer1, Synaptic Systems #160004  
 mouse anti-Myc-epitope, Santa Cruz #sc-40  
 rabbit anti-V5-epitope, Cell Signaling #13202S  
 rabbit anti-GFP, Cell Signaling #2956S  
 goat anti-SYNGAP1, Sigma #SAB2501893  
 rabbit anti-SYNGAP1, ThermoFisher #PA5-58362  
 rabbit anti-ANKS1B, ThermoFisher #PA5-98554  
 rabbit anti-SHANK2, Cell signaling #12218S  
 mouse anti-AnkyrinG, ThermoFisher #33-8800  
 mouse anti-NaV1.2, Antibodiesinc #75-024  
 mouse anti-ANKS1B, Santa Cruz #sc-376610  
 Alexa Fluor and IRDye conjugated secondary antibodies.

## Validation

Antibodies were chosen based on reviewing validation data provided by the manufacturers and literature citing these antibodies. Validation information about these commercial antibodies can be found on the manufacturers' websites:

rabbit anti-HA, Cell Signaling #3724  
<https://www.cellsignal.com/products/primary-antibodies/ha-tag-c29f4-rabbit-mab/3724>  
 rat anti-HA, Sigma #11867423001  
<https://www.sigmaaldrich.com/US/en/product/roche/roahaha>  
 mouse anti-PSD95, Abcam #ab2723  
<https://www.abcam.com/psd95-antibody-6g6-1c9-synaptic-marker-ab2723.html>  
 rabbit anti-GAPDH, Abcam #ab9485  
<https://www.abcam.com/gapdh-antibody-loading-control-ab9485.html>  
 rabbit anti-GAPDH, Cell Signaling #2118  
<https://www.cellsignal.com/products/primary-antibodies/gapdh-14c10-rabbit-mab/2118>  
 mouse anti-V5-epitope, ThermoFisher #R960-25  
<https://www.thermofisher.com/antibody/product/V5-Tag-Antibody-Monoclonal/R960-25>  
 guinea pig anti-Homer1, Synaptic Systems #160004  
[https://sysy.com/product-factsheet/SySy\\_160004](https://sysy.com/product-factsheet/SySy_160004)  
 mouse anti-Myc-epitope, Santa Cruz #sc-40  
<https://datasheets.scbt.com/sc-40.pdf>  
 rabbit anti-V5-epitope, Cell Signaling #13202S  
<https://www.cellsignal.com/products/primary-antibodies/v5-tag-d3h8q-rabbit-mab/13202>  
 rabbit anti-GFP, Cell Signaling #2956S  
<https://www.cellsignal.com/products/primary-antibodies/gfp-d5-1-rabbit-mab/2956>  
 goat anti-SYNGAP1, Sigma #SAB2501893  
<https://www.sigmaaldrich.com/US/en/product/sigma/sab2501893>  
 rabbit anti-SYNGAP1, ThermoFisher #PA5-58362  
<https://www.thermofisher.com/antibody/product/SynGAP-Antibody-Polyclonal/PA5-58362>  
 rabbit anti-ANKS1B, ThermoFisher #PA5-98554  
<https://www.thermofisher.com/antibody/product/ANKS1B-Antibody-Polyclonal/PA5-98554>  
 rabbit anti-SHANK2, Cell signaling #12218S  
<https://www.cellsignal.com/products/primary-antibodies/shank2-antibody/12218>  
 mouse anti-AnkyrinG, ThermoFisher #33-8800  
<https://www.thermofisher.com/antibody/product/Ankyrin-G-Antibody-clone-4G3F8-Monoclonal/33-8800>  
 mouse anti-NaV1.2, Antibodiesinc #75-024  
<https://www.antibodiesinc.com/products/anti-nav1-2-na-channel-antibody-k69-3-75-024>  
 mouse anti-ANKS1B, Santa Cruz #sc-376610  
<https://www.scbt.com/p/aida-1-antibody-c-10>

## Eukaryotic cell lines

Policy information about [cell lines and Sex and Gender in Research](#)

|                                                                      |                                                                             |
|----------------------------------------------------------------------|-----------------------------------------------------------------------------|
| Cell line source(s)                                                  | HEK293T cell line was obtained from American Type Culture Collection (ATCC) |
| Authentication                                                       | The cell line was validated by STR testing.                                 |
| Mycoplasma contamination                                             | The cell line was tested for mycoplasma contamination and was negative.     |
| Commonly misidentified lines<br>(See <a href="#">ICLAC</a> register) | n/a                                                                         |

## Animals and other research organisms

Policy information about [studies involving animals](#); [ARRIVE guidelines](#) recommended for reporting animal research, and [Sex and Gender in Research](#)

|                         |                                                                                                                                                                                                                                                                                                                                                                                                                                                                                                                                                                   |
|-------------------------|-------------------------------------------------------------------------------------------------------------------------------------------------------------------------------------------------------------------------------------------------------------------------------------------------------------------------------------------------------------------------------------------------------------------------------------------------------------------------------------------------------------------------------------------------------------------|
| Laboratory animals      | P0-P28 male and female H11-Cas9 mice (Jackson Laboratory), P0-2 and adult male and female Scn2a(+/-R102Q) mice (generated by the Duke Transgenic and Knockout Mouse Shared Resource), adult male and female Syngap1-Het mice (a gift from Dr. Gavin Rumbaugh), adult C57BL/6J females (Jackson Laboratory), adult C3H/HeJ males (Jackson Laboratory). Mice were group-housed in the Duke University's Division of Laboratory Animal Resources facility, with an ambient temperature of 72 +/- 2 Fahrenheit, humidity of 30-70%, and light cycle of 12 hrs on/off. |
| Wild animals            | This study did not involve wild animals.                                                                                                                                                                                                                                                                                                                                                                                                                                                                                                                          |
| Reporting on sex        | Animals of both sexes were used in this study, except for the social interaction tests where data were collected only from male mice.                                                                                                                                                                                                                                                                                                                                                                                                                             |
| Field-collected samples | This study did not involve samples collected from the field.                                                                                                                                                                                                                                                                                                                                                                                                                                                                                                      |
| Ethics oversight        | The Duke University Institutional Animal Care and Use Committee provided ethical approval and guidance.                                                                                                                                                                                                                                                                                                                                                                                                                                                           |

Note that full information on the approval of the study protocol must also be provided in the manuscript.

## Plants

|                       |     |
|-----------------------|-----|
| Seed stocks           | n/a |
| Novel plant genotypes | n/a |
| Authentication        | n/a |
